# Supplementary material for: High-Dose Irradiation Inhibits Motility and Induces Autophagy in Caenorhabditis elegans
Source: MDPI journal article supplement (doi:10.3390/ijms22189810), 2021-09-10
Supplement: s1 [file s1]

## Supplementary Materials

### High-Dose Irradiation Inhibits Motility and Induces Autophagy in

### *Caenorhabditis elegans*

Akira Yamasaki <sup>1,2</sup>, Michiyo Suzuki <sup>2,\*</sup>, Tomoo Funayama <sup>2</sup>, Takahito Moriwaki <sup>1,3</sup>, Tetsuya Sakashita <sup>2</sup>,  
Yasuhiko Kobayashi <sup>2</sup>, and Qui-Mei Zhang-Akiyama <sup>1,\*</sup>

<sup>1</sup> Laboratory of Stress Response Biology, Graduate School of Science, Kyoto University,  
Kitashirakawa-Oiwakecho, Sakyo-ku, Kyoto 606-8502, Japan

<sup>2</sup> Department of Radiation-Applied Biology Research, Takasaki Advanced Radiation Research Institute,  
National Institutes for Quantum and Radiological Science and Technology (QST-Takasaki), 1233 Watanuki,  
Takasaki 370-1292, Japan

<sup>3</sup> Department of Pathophysiology and Metabolism, Kawasaki Medical School, Okayama, 701-0192, Japan

Correspondence:

\* Qiu-Mei Zhang-Akiyama, Ph.D.

Laboratory of Stress Response Biology, Graduate School of Science, Kyoto University,  
Kitashirakawa-Oiwakecho, Sakyo-ku, Kyoto 606-8502, Japan

Email: qmzhang@kingyo.zool.kyoto-u.ac.jp; Tel.: +81-(0)75-753-4097; Fax: +81-(0)75-753-4087

\* Michiyo Suzuki, Ph.D.

Department of Radiation-Applied Biology Research, Takasaki Advanced Radiation Research Institute, National  
Institutes for Quantum and Radiological Science and Technology (QST-Takasaki),  
1233 Watanuki, Takasaki 370-1292, Japan

Email: suzuki.michiyo.@qst.go.jp; Tel.: +81-(0)27-346-9114; Fax: +81-(0)27-346-9353

## Supplementary Figures

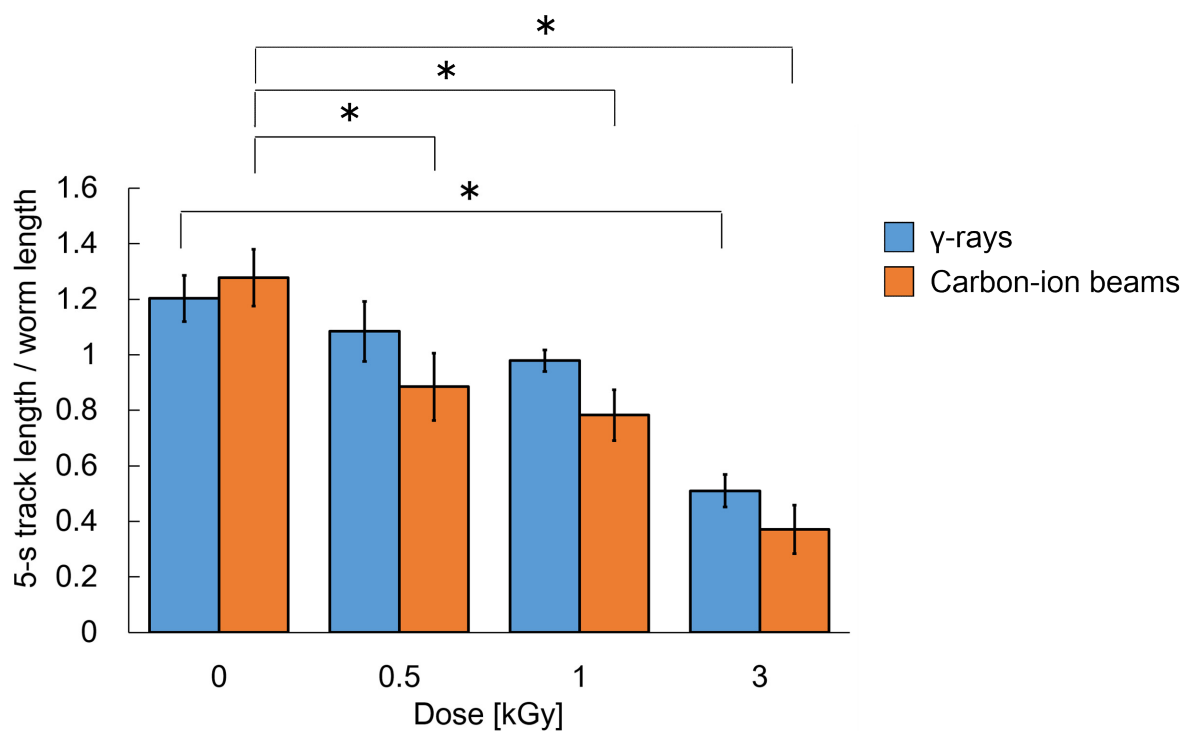

**Figure S1.** Crawling ability of worms immediately after whole-body irradiation with different doses of  $\gamma$ -rays or carbon-ion beams. To evaluate motility of the irradiated worms, trajectories in crawling for 5-s duration were extracted and divided by the worm length, and the values of 5 worms were averaged at each condition every experiment. For each dose of radiation, 6 trials for  $\gamma$ -rays and 4 trials for carbon-ion broad beams were conducted. Error bar indicates SEM. The data was analyzed by the Student's  $t$ -test. \* indicates  $p$ -value  $< 0.05$ , significantly different one compared with the 0 kGy.

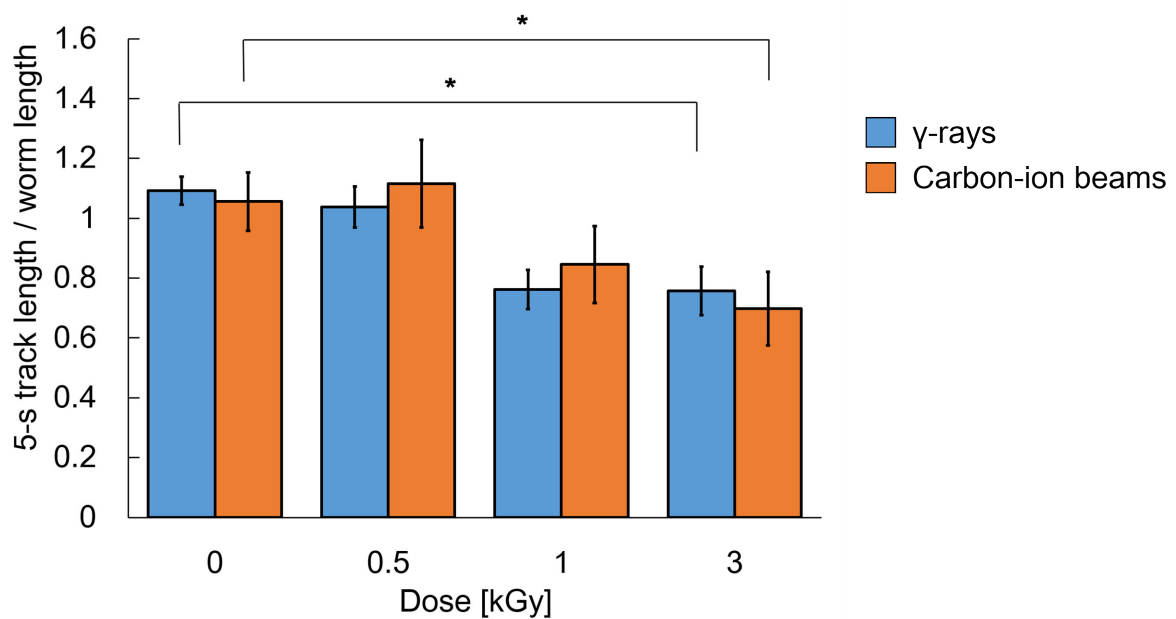

**Figure S2.** Crawling ability of worms 24 hours after whole-body irradiation with different doses of  $\gamma$ -rays or carbon-ion beams. To evaluate motility of the irradiated worms, trajectories in crawling for 5-s duration were extracted and divided by the worm length, and the values of 5 worms were averaged at each condition every experiment. For each dose of radiation, 6 trials for  $\gamma$ -rays and 4 trials for carbon-ion broad beams were conducted. Error bar indicates SEM. The data was analyzed by the Student's *t*-test. \* indicates *p*-value < 0.05, significantly different one compared with the 0 kGy.

**Video S1.** Typical crawling of non-irradiated control worm on agar for 5-s duration.

Original video of non-irradiated worm analyzed in Figure. 2B.

**Video S2.** Typical crawling of worms on agar for 5-s duration after whole-body irradiation with 6 kGy of  $\gamma$ -rays.

Each movie represents same three worms irradiated with 6 kGy (A) immediately after irradiation (0 hour), or (B) 24 hours after irradiation.
