# Supplementary material for: High-Dose Irradiation Inhibits Motility and Induces Autophagy in Caenorhabditis elegans
Source: Int J Mol Sci. 2021 Sep 10;22(18):9810. doi: 10.3390/ijms22189810 (PMC8467272; doi:10.3390/ijms22189810)
Supplement: Supplementary file 1 [file ijms-22-09810-s001.zip]

Archive with 4 entries (4 files):
- Supplementary Materials.pdf
- VideoS1.avi
- VideoS2A.avi
- VideoS2B.avi
